# Supplementary material
Source: publisher figshare collection journal article supplement (https://sage.figshare.com/ndownloader/files/38645020)
Supplement: Supplementary file 1 [file 38645020]

## Sheet: Ark1
IEEE
	P		I	C	O
OR	AND
	Mesh_Terms:diabetes mellitus, type 2		All Metadata: insulin	All Metadata: initiat*	All Metadata:algoritm*
	All Metadata:t2dm		Mesh_Terms" insulin	All Metadata: titrat*	All Metadata:decision support
	All Metadata:"typeii diabetes"			All Metadata: adjust*	All Metadata:telemedicine
	All Metadata:"type 2 diabetes"				All Metadata:telehealth
	All Metadata:"type ii diabetes"				All Metadata:tele health
	All Metadata:t2d				All Metadata:mathematical model*
	All Metadata:"type2 diabetes"				Mesh_Terms:algorithms
					Mesh_Terms:telemedicine
					Mesh_Terms: models, theoretical
					Mesh_Terms: Information Systems
					Mesh_Terms: Decision Support Techniques
					Mesh_Terms: decision making, computer assisted
					All Metadata:guidance
EMBASE
	P		I	C	O
OR	AND
	non insulin dependent diabetes mellitus'/exp		'insulin'/exp	initiat*:ti,ab,kw	mathematical model'/exp
	diabet*:ti,ab,kw	type2:ti,ab,kw	insulin:ti,ab,kw	titat*:ti,ab,kw	decision support system'/exp
		typeii:ti,ab,kw		adjust*:ti.ab,kw	telemedicine'/exp
		type 2':ti,ab,kw			algorithm'/exp
		type ii':ti,ab,kw			algorithm*:ti,ab,kw
	t2d:ti,ab,kw				decision support':ti,ab,kw
	t2dm:ti,ab,kw				telemedicine:ti,ab,kw
					telehealth:ti,ab,kw
					tele health':ti,ab,kw
					mathematical model':ti,ab,kw
					guidance:ti,ab,kw
PUBMED
	P		I	C	O
OR	AND
	"Diabetes Mellitus, Type 2"[Mesh]		("Insulin"[MeSH Terms]	"initiat*"[Text Word]	algorithm*[Text Word])
	"diabet*"[Text Word]	"type2"[Text Word]	"Insulin"[Text Word]	"titrat*"[Text Word]	decision support[Text Word]
		"typeii"[Text Word]	Text Word	"adjust*"[Text Word]	telemedicine[Text Word]
		"type 2"[Text Word]			telehealth[Text Word]
		"type ii"[Text Word]			tele health[Text Word]
	"t2d"[Text Word]				mathematical model*[Text Word]
	"t2dm"[Text Word]				guidance[Text Word]
					"Models, Theoretical"[Mesh]
					"Decision Making, Computer-Assisted"[Mesh]
					"Decision Support Techniques"[Mesh]
					"Information Systems"[Mesh]
					"Telemedicine"[Mesh]
					"Algorithms"[Mesh]
